# Supplementary material for: Quantification of Iron Release from Native Ferritin and Magnetoferritin Induced by Vitamins B2 and C
Source: MDPI journal article supplement (doi:10.3390/ijms21176332), 2020-08-31
Supplement: s1 [file s1]

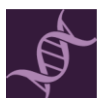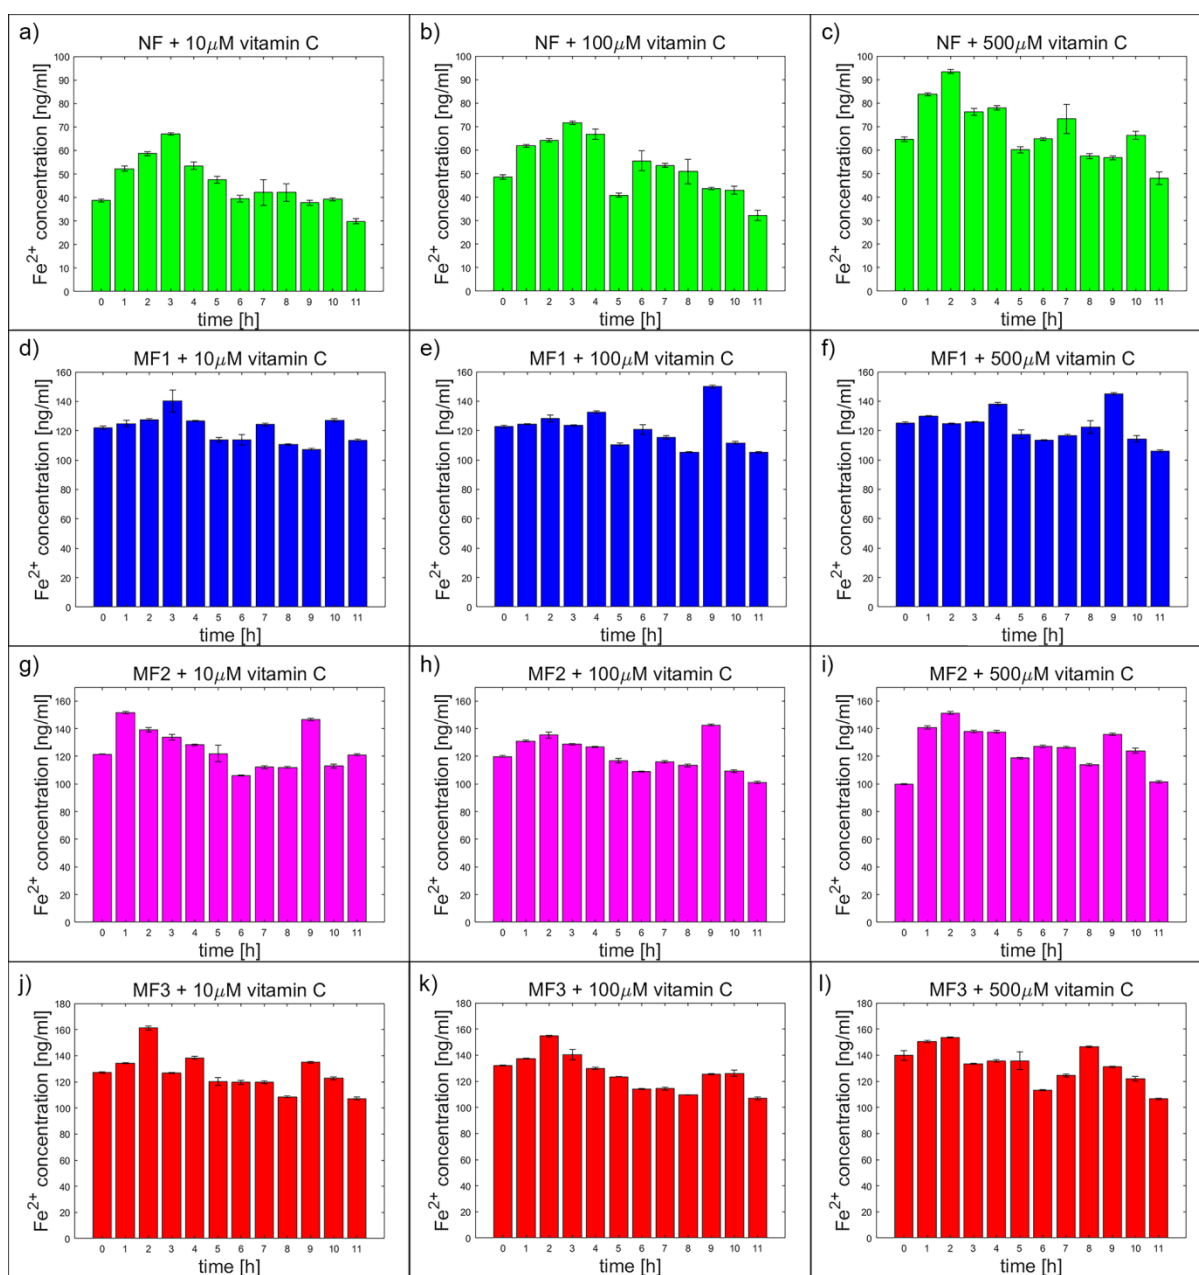

**Figure S1.** Time dependences of ferrous ion release (mean  $\pm$  SD) from NF and MF with different LFs, induced by various concentrations of ascorbic acid (vitamin C): (a) NF with LF = 868 and vitamin C concentration = 10  $\mu\text{M}$ ; (b) NF with LF = 868 and vitamin C concentration = 100  $\mu\text{M}$ ; (c) NF with LF = 868 and vitamin C concentration = 500  $\mu\text{M}$ ; (d) MF1 with LF = 553 and vitamin C concentration = 10  $\mu\text{M}$ ; (e) MF1 with LF = 553 and vitamin C concentration = 100  $\mu\text{M}$ ; (f) MF1 with LF = 553 and vitamin C concentration = 500  $\mu\text{M}$ ; (g) MF2 with LF = 733 and vitamin C concentration = 10  $\mu\text{M}$ ; (h) MF2 with LF = 733 and vitamin C concentration = 100  $\mu\text{M}$ ; (i) MF2 with LF = 733 and vitamin C concentration = 500  $\mu\text{M}$ ; (j) MF3 with LF = 873 and vitamin C concentration = 10  $\mu\text{M}$ ; (k) MF3 with LF = 873 and vitamin C concentration = 100  $\mu\text{M}$ ; (l) MF3 with LF = 873 and vitamin C concentration = 500  $\mu\text{M}$ .

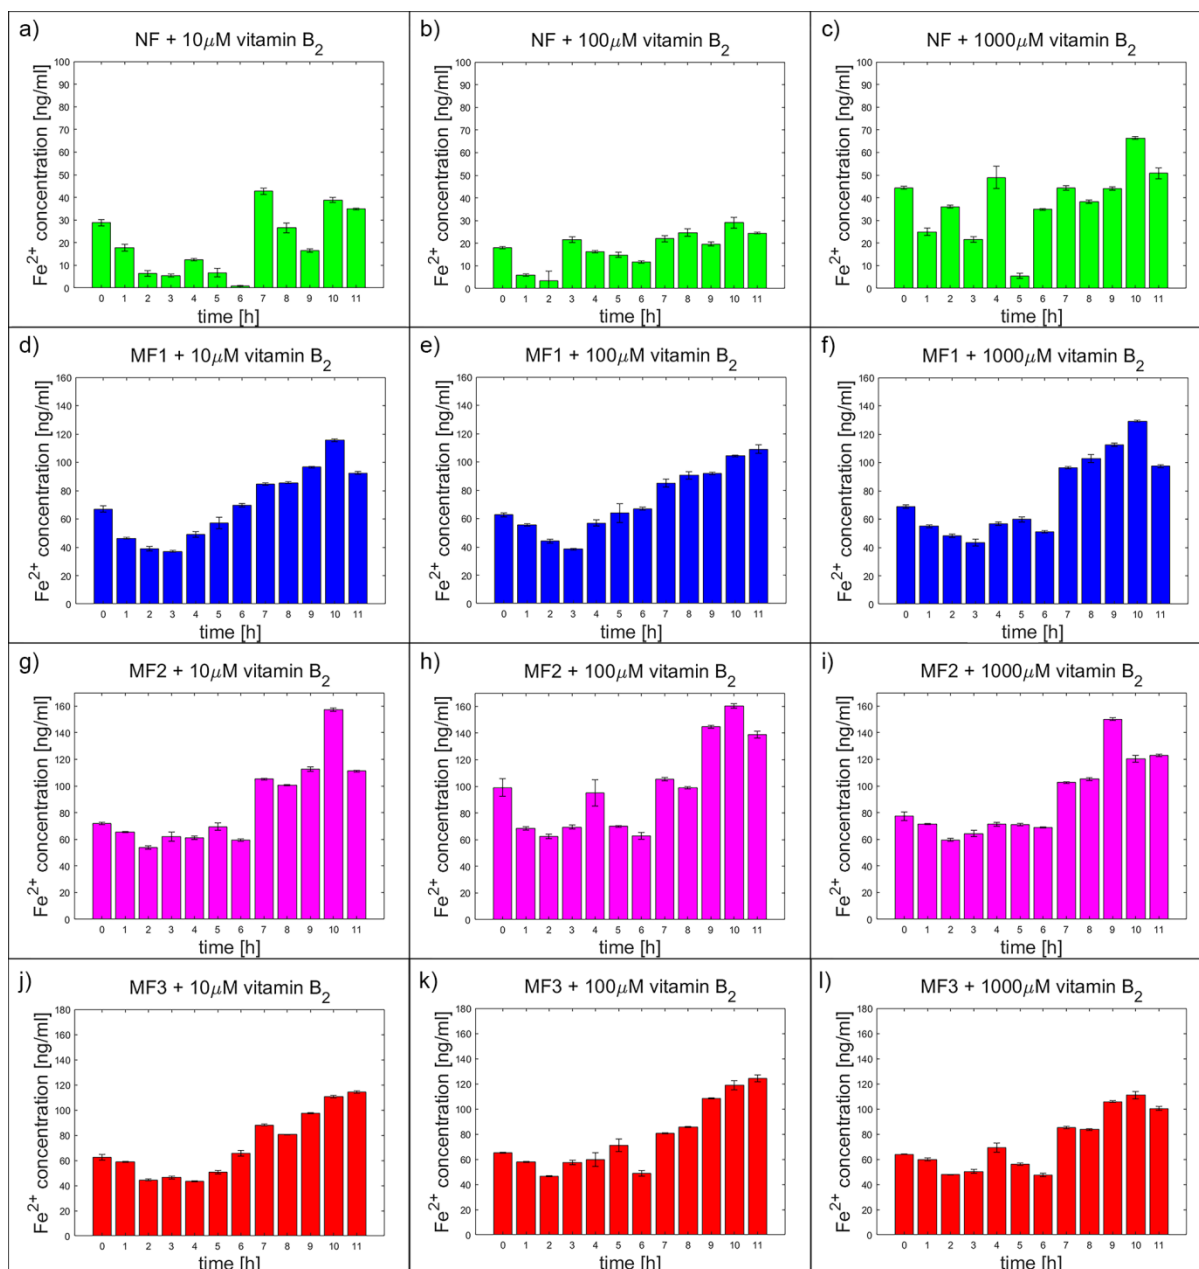

**Figure S2.** Time dependences of ferrous ion release (mean  $\pm$  SD) from NF and MF with different LFs, induced by various concentrations of riboflavin (vitamin B<sub>2</sub>): (a) NF with LF = 868 and vitamin B<sub>2</sub> concentration = 10  $\mu$ M; (b) NF with LF = 868 and vitamin B<sub>2</sub> concentration = 100  $\mu$ M; (c) NF with LF = 868 and vitamin B<sub>2</sub> concentration = 1000  $\mu$ M; (d) MF1 with LF = 553 and vitamin B<sub>2</sub> concentration = 10  $\mu$ M; (e) MF1 with LF = 553 and vitamin B<sub>2</sub> concentration = 100  $\mu$ M; (f) MF1 with LF = 553 and vitamin B<sub>2</sub> concentration = 1000  $\mu$ M; (g) MF2 with LF = 733 and vitamin B<sub>2</sub> concentration = 10  $\mu$ M; (h) MF2 with LF = 733 and vitamin B<sub>2</sub> concentration = 100  $\mu$ M; (i) MF2 with LF = 733 and vitamin B<sub>2</sub> concentration = 1000  $\mu$ M; (j) MF3 with LF = 873 and vitamin B<sub>2</sub> concentration = 10  $\mu$ M; (k) MF3 with LF = 873 and vitamin B<sub>2</sub> concentration = 100  $\mu$ M; (l) MF3 with LF = 873 and vitamin B<sub>2</sub> concentration = 1000  $\mu$ M.

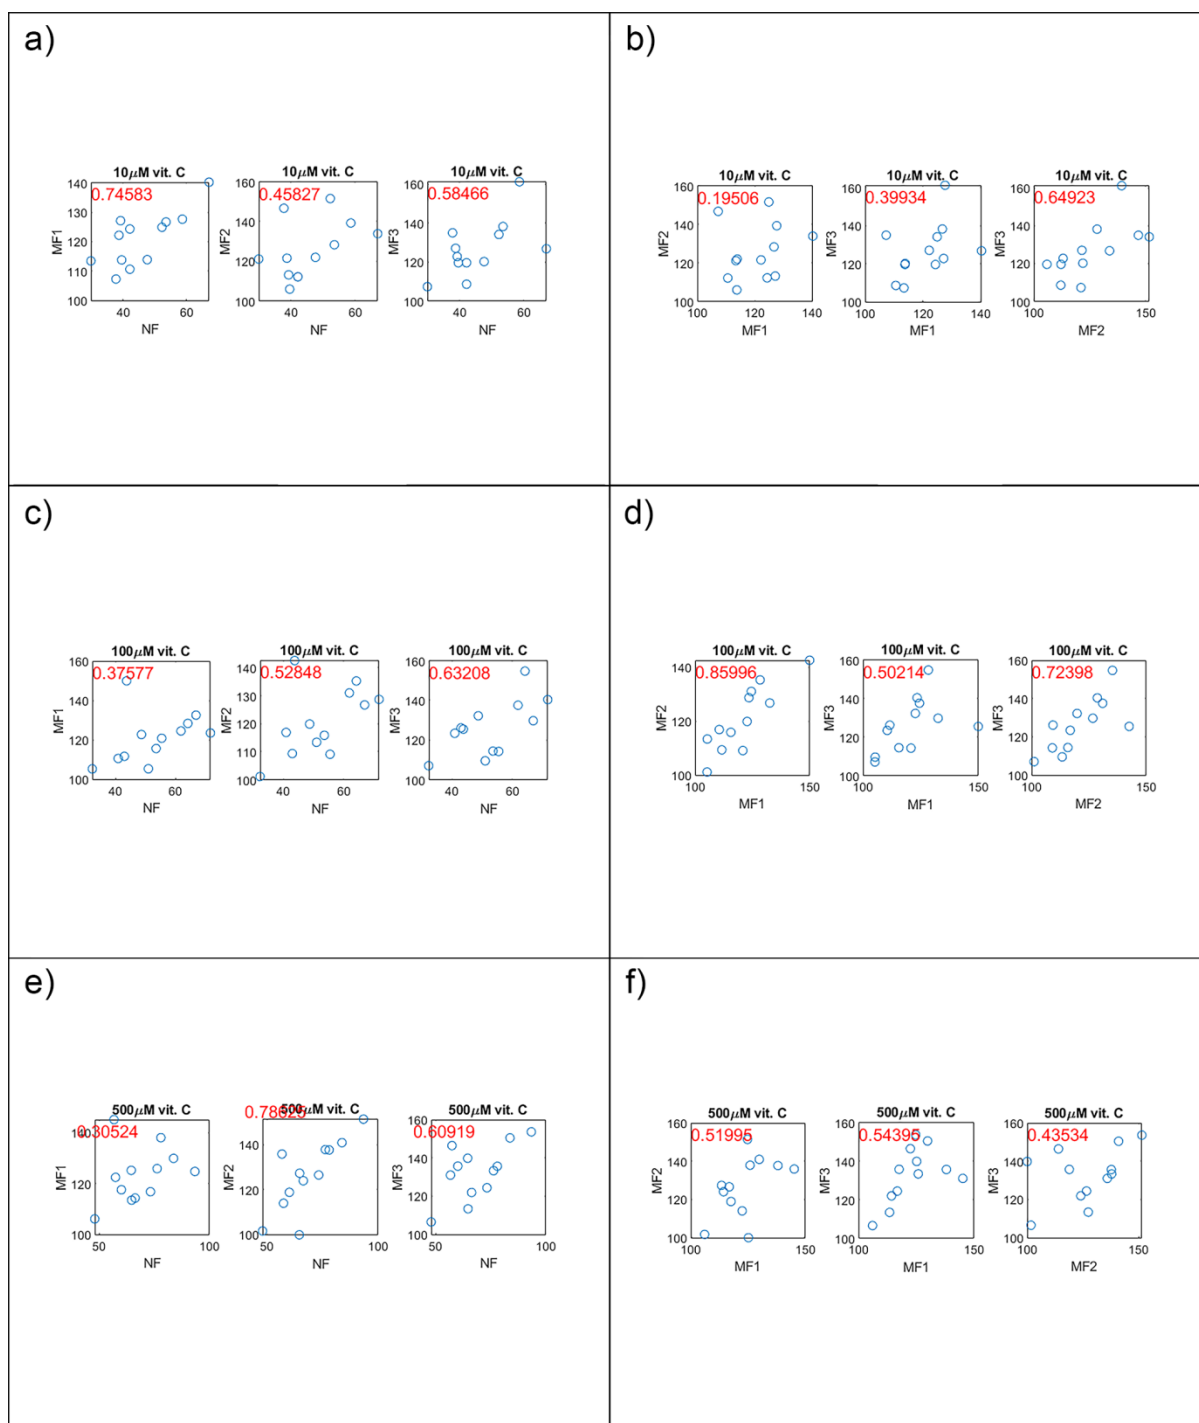

**Figure S3.** Correlation coefficient values (red) of ferrous ion release from NF and MF with different LFs, induced by various concentrations of ascorbic acid (vitamin C): (a) NF-MF1, NF-MF2, NF-MF3, vitamin C concentration = 10  $\mu$ M; (b) MF1-MF2, MF1-MF3, MF2-MF3, vitamin C concentration = 10  $\mu$ M; (c) NF-MF1, NF-MF2, NF-MF3, vitamin C concentration = 100  $\mu$ M; (d) MF1-MF2, MF1-MF3, MF2-MF3, vitamin C concentration = 100  $\mu$ M; (e) NF-MF1, NF-MF2, NF-MF3, vitamin C concentration = 500  $\mu$ M; (f) MF1-MF2, MF1-MF3, MF2-MF3, vitamin C concentration = 500  $\mu$ M.

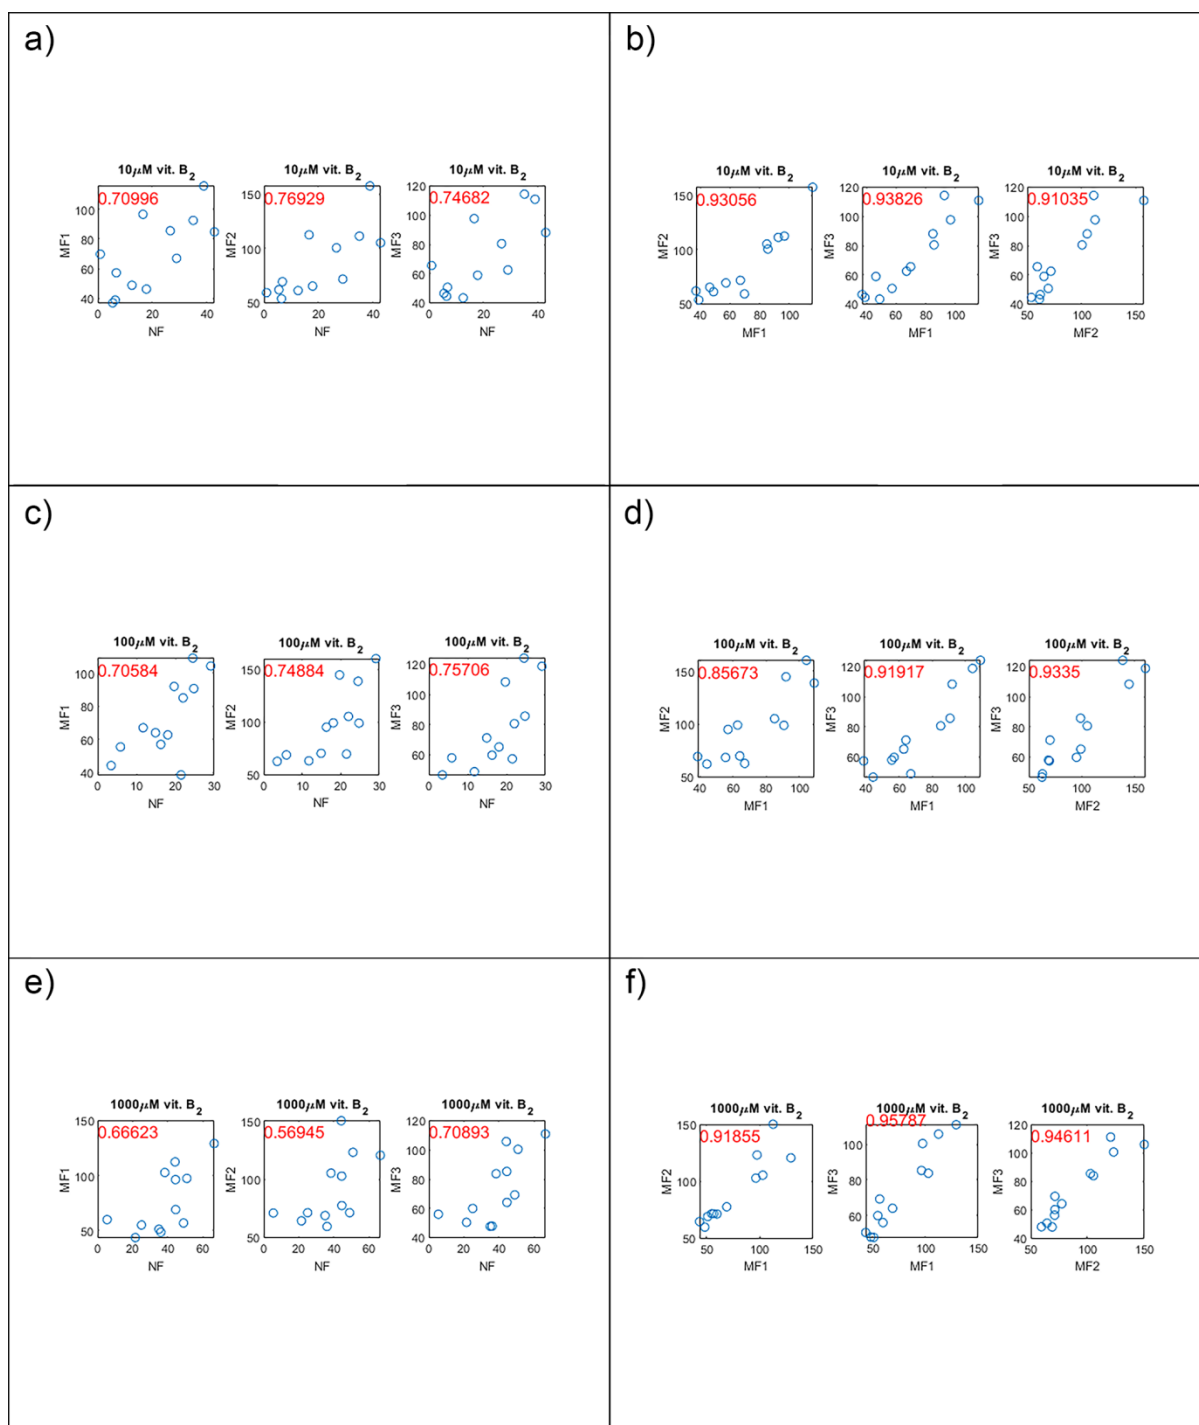

**Figure S4.** Correlation coefficient values (red) of ferrous ion release from NF and MF with different LFs, induced by various concentrations of riboflavin (vitamin B<sub>2</sub>): (a) NF-MF1, NF-MF2, NF-MF3, vitamin B<sub>2</sub> concentration = 10  $\mu$ M; (b) MF1-MF2, MF1-MF3, MF2-MF3, vitamin B<sub>2</sub> concentration = 10  $\mu$ M; (c) NF-MF1, NF-MF2, NF-MF3, vitamin B<sub>2</sub> concentration = 100  $\mu$ M; (d) MF1-MF2, MF1-MF3, MF2-MF3, vitamin B<sub>2</sub> concentration = 100  $\mu$ M; (e) NF-MF1, NF-MF2, NF-MF3, vitamin B<sub>2</sub> concentration = 1000  $\mu$ M; (f) MF1-MF2, MF1-MF3, MF2-MF3, vitamin B<sub>2</sub> concentration = 1000  $\mu$ M.

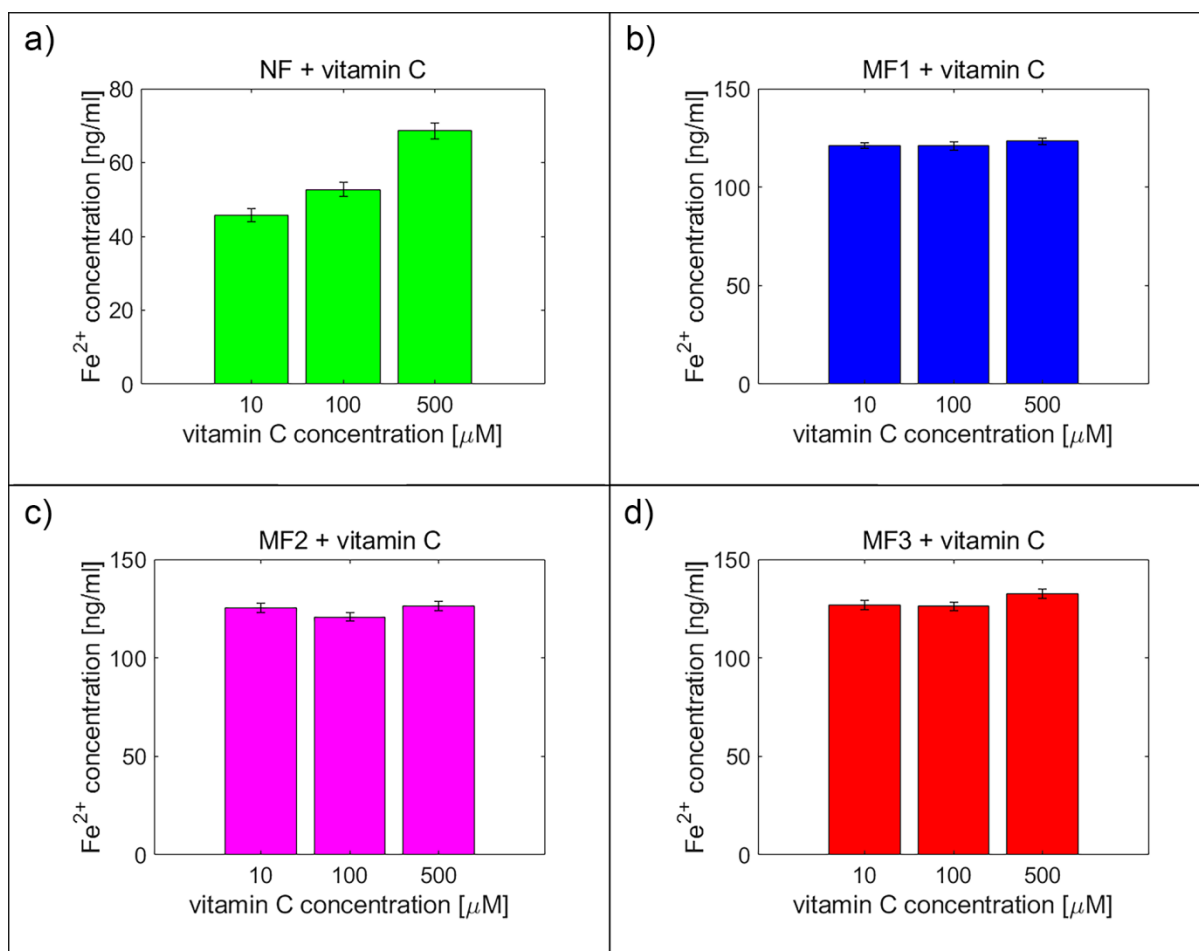

**Figure S5.** 95 % confidence interval (mean of the means  $\pm$  2 SEM) of the reduction rate of ferrous ions from NF and MF mineral cores per hour induced by various concentrations of riboflavin (vitamin C): (a) NF; (b) MF1; (c) MF2; (d) MF3.

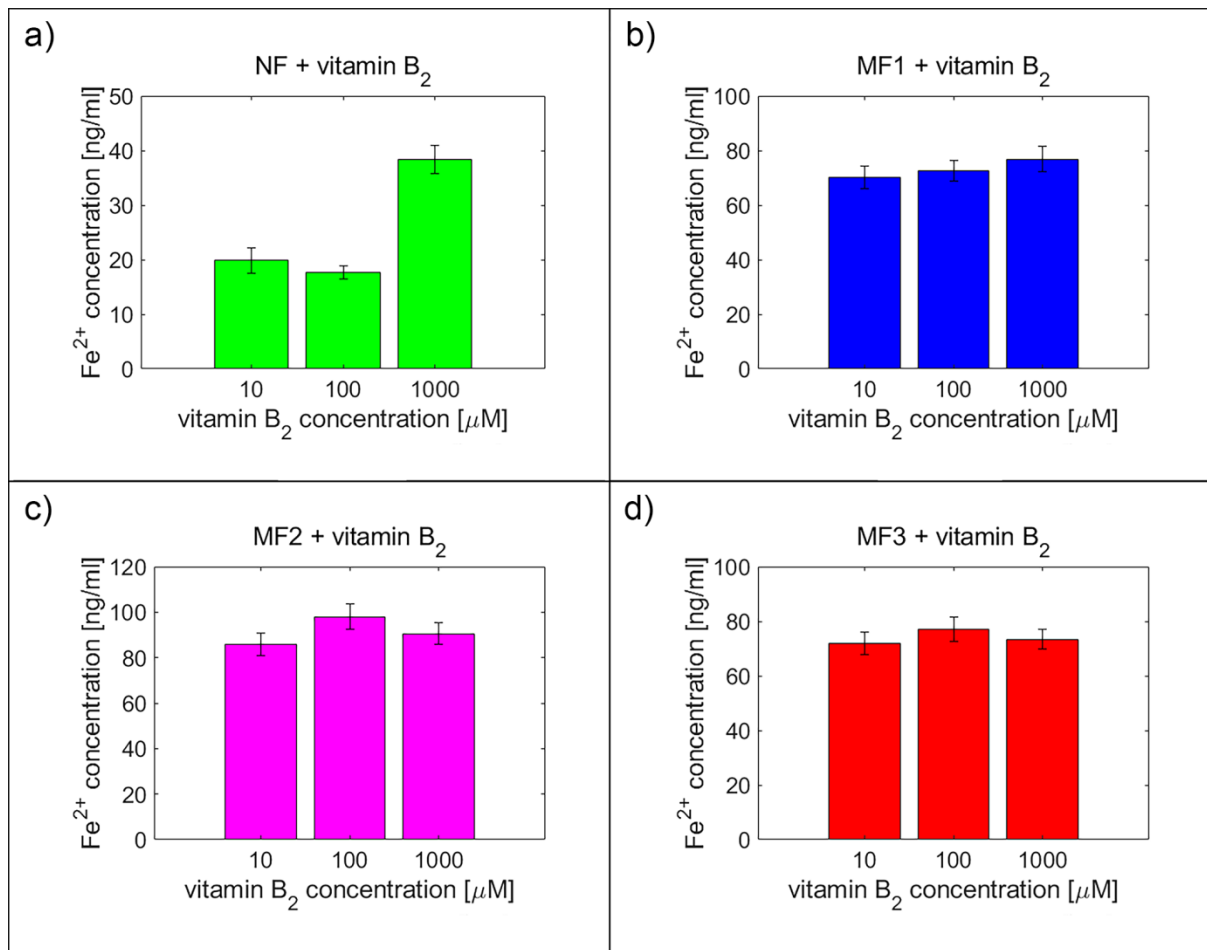

**Figure S6.** 95 % confidence interval (mean of the means ± 2 SEM) of the reduction rate of ferrous ions from NF and MF mineral cores per hour induced by various concentrations of riboflavin (vitamin B<sub>2</sub>): (a) NF; (b) MF1; (c) MF2; (d) MF3.

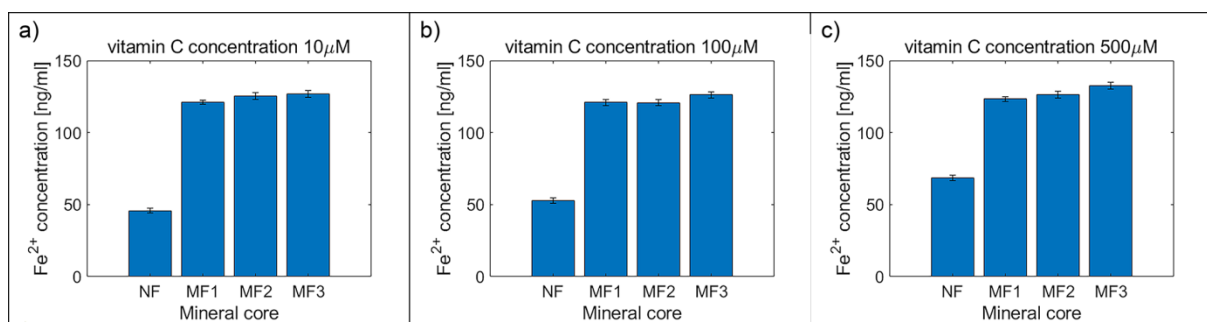

**Figure 7S.** 95 % confidence interval (mean of the means ± 2 SEM) of the reduction rate of ferrous ions from NF and MF mineral cores per hour induced by different concentrations of riboflavin (vitamin C): (a) 10 μM; (b) 100 μM; (c) 1000 μM.

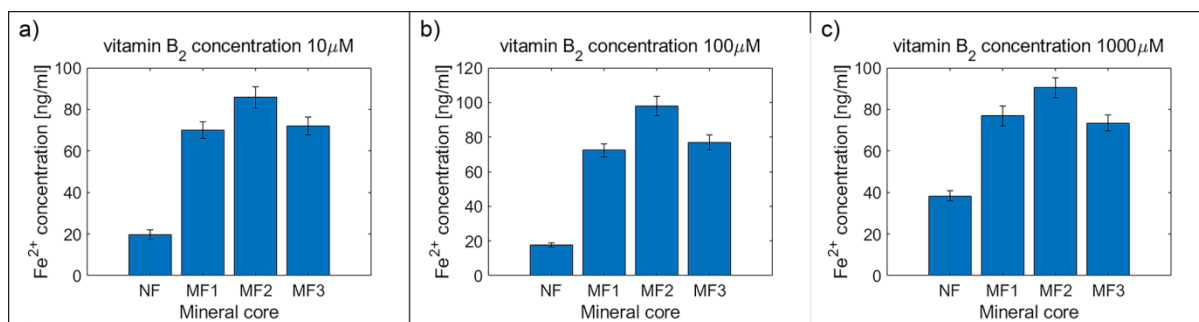

**Figure S8.** 95 % confidence interval (mean of the means  $\pm$  2 SEM) of the reduction rate of ferrous ions from NF and MF mineral cores per hour induced by different concentrations of riboflavin (vitamin B<sub>2</sub>): (a) 10  $\mu$ M; (b) 100  $\mu$ M; (c) 1000  $\mu$ M.
